# Supplementary material for: Determination of trace rhodamine B by spectrofluorometry and magnetic solid phase extraction based on a 3D reduced graphene oxide composite
Source: Royal Society of Chemistry journal article supplement (doi:10.1039/c7ay01622k), 2017-01-01
Supplement: c7ay01622k1.pdf [file c7ay01622k1.pdf]

## Supplementary Material

Determination of trace rhodamine B by spectrofluorometry and magnetic solid phase extraction based on a 3D reduced graphene oxide nanocomposite

Jun Yan<sup>\*a,1</sup>, Jian-Mei Cen<sup>a,1</sup>, Xue-Cai Tan<sup>a</sup>, Shao-Fen Tan<sup>a</sup>,

Ye-Yu Wu<sup>a</sup>, Hui Zhang<sup>a</sup>, Qi Wang<sup>b</sup>

<sup>a</sup> Key Laboratory of Guangxi Colleges and University for Food Safety and Pharmaceutical Chemistry, School of Chemistry and Chemical Engineering, Guangxi University for Nationalities, Nanning, 530006, People's Republic of China

<sup>b</sup> Research Center for Analysis and Measurement, Kunming University of Science and Technology, Kunming 650093, Yunnan, People's Republic of China

---

<sup>1</sup>These authors contributed equally to this paper.

\*Corresponding author. Tel.: +86 731 3267019; E-mail address: yanjun03@163.com

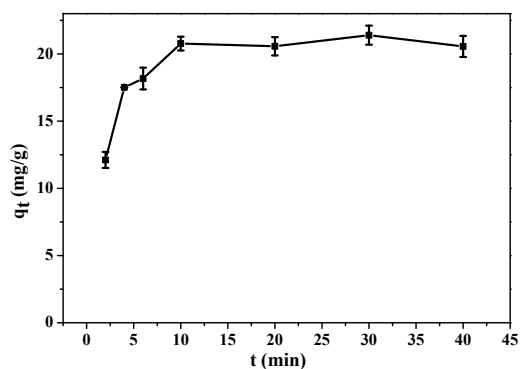

**Fig. S1.** Effect of adsorption time on the adsorbed amount of rhodamine B by 3D-RGO/Fe<sub>3</sub>O<sub>4</sub>.

**Table S1**

Adsorption kinetics parameters for the adsorption of rhodamine B onto 3D-RGO/Fe<sub>3</sub>O<sub>4</sub>.

| $q_{e,exp}$ (mg g <sup>-1</sup> ) | $q_{e,cal}$ (mg g <sup>-1</sup> ) | $k_s$ (g mg <sup>-1</sup> min <sup>-1</sup> ) | R <sup>2</sup> |
|-----------------------------------|-----------------------------------|-----------------------------------------------|----------------|
| 20.773                            | 21.436                            | 0.0508                                        | 0.9980         |

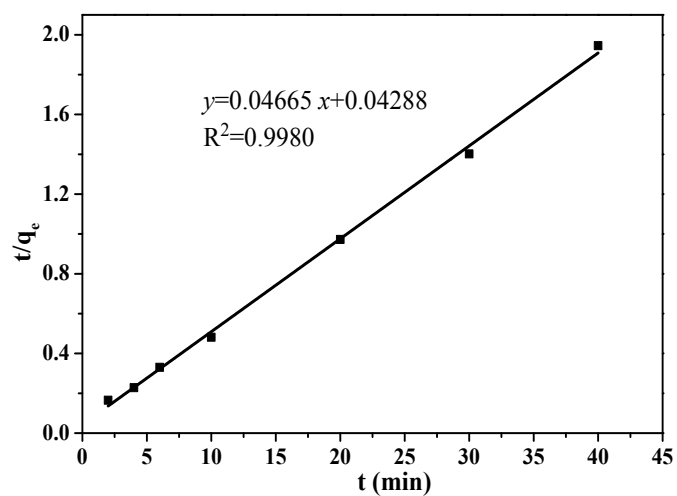

**Fig. S2.** Pseudo-second order model of rhodamine B onto 3D-RGO/Fe<sub>3</sub>O<sub>4</sub>.

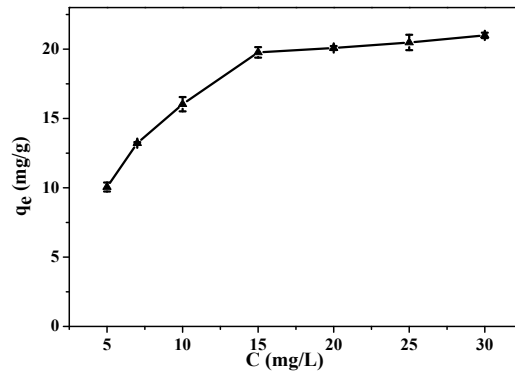

Fig. S3. Adsorption isotherms of rhodamine B with different concentrations.

Table S2

Two isotherm model parameters for the adsorption of rhodamine B onto 3D-RGO/Fe<sub>3</sub>O<sub>4</sub>

| Langmuir isotherm            |                       |        | Freundlich isotherm                                                  |        |        |
|------------------------------|-----------------------|--------|----------------------------------------------------------------------|--------|--------|
| $Q_{\max}(\text{mg g}^{-1})$ | $b(\text{L mg}^{-1})$ | $R^2$  | $K_F(\text{mg g}^{-1} \cdot (\text{L} \cdot \text{mg}^{-1})^{-1/n})$ | $1/n$  | $R^2$  |
| 22.09                        | 0.85                  | 0.9942 | 11.2595                                                              | 0.2279 | 0.9017 |

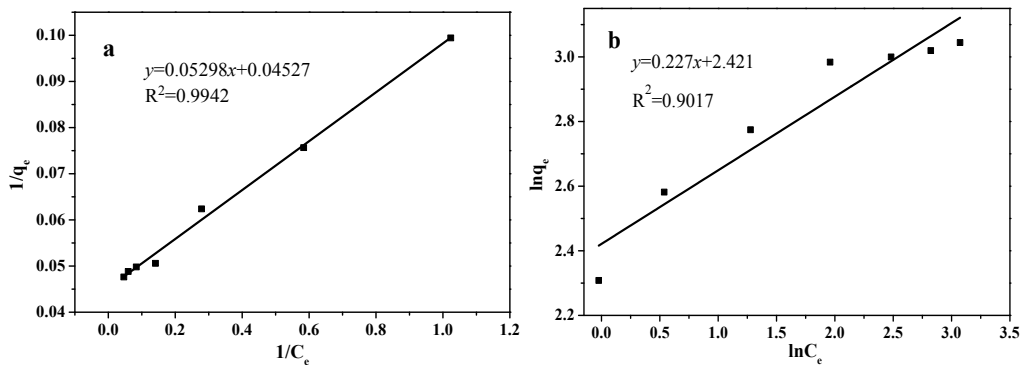

Fig. S4. Langmuir isotherm model of rhodamine B onto 3D-RGO/Fe<sub>3</sub>O<sub>4</sub> (a); Freundlich isotherm model of rhodamine B onto 3D-RGO/Fe<sub>3</sub>O<sub>4</sub> (b).

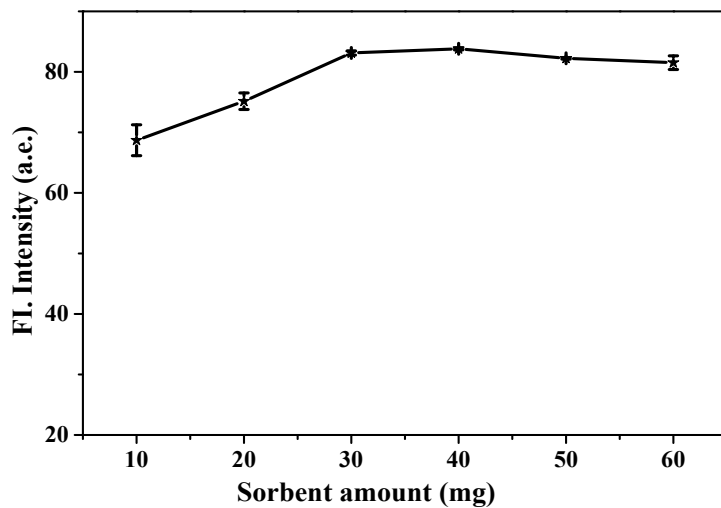

**Fig. S5.** Effect of sorbent dosage;

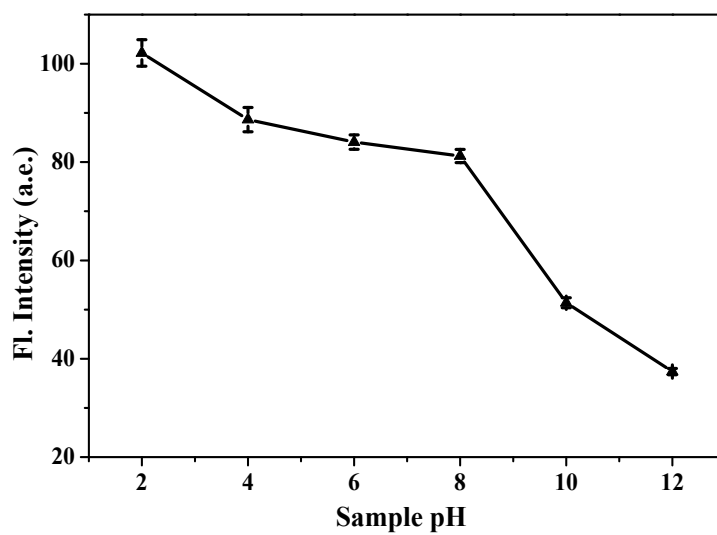

**Fig. S6.** Effect of pH;

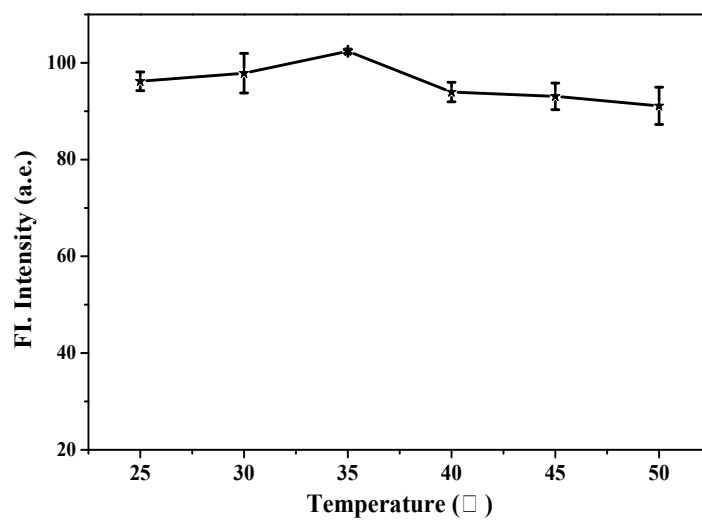

**Fig. S7.** Effect of extraction temperature

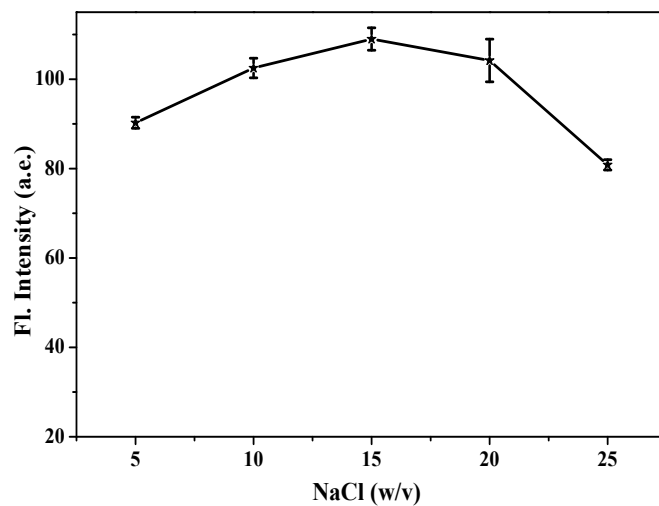

Fig. S8. Effect of ionic strength

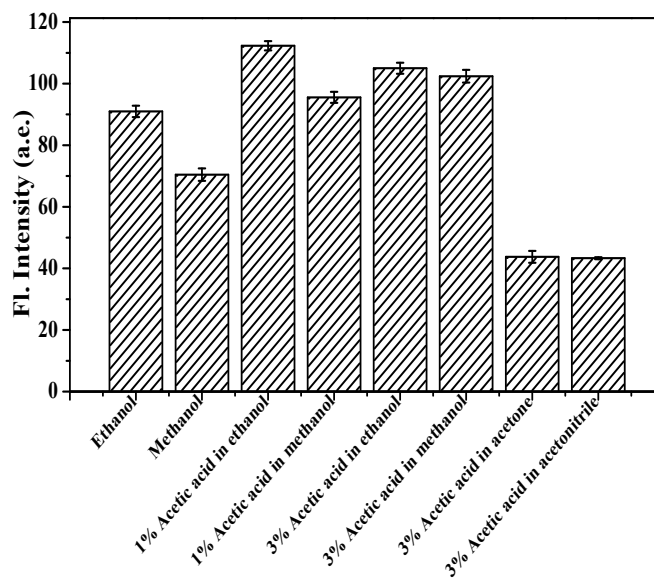

Fig. S9. Effect of desorption solvent.

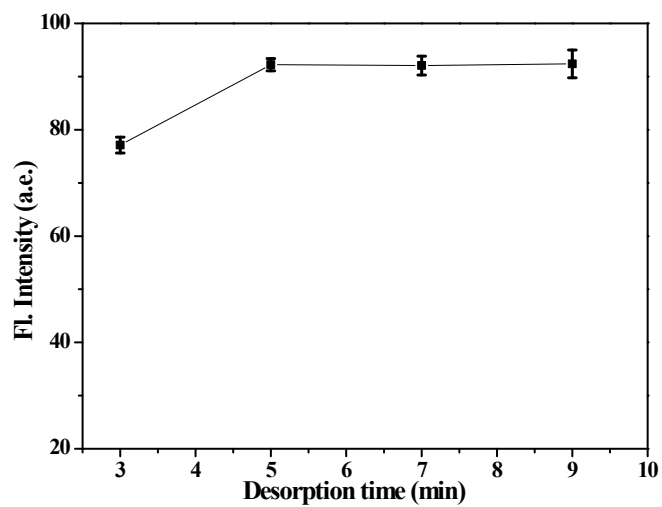

Fig. S10. Effect of desorption time for rhodamine B.

**Table S3.** Tolerance limits of interfering species on the recovery of 50  $\mu\text{g L}^{-1}$  of rhodamine B from water.

| Ions               | Tolerance ratio (w/v) | Added as                                  | Recovery (%) |
|--------------------|-----------------------|-------------------------------------------|--------------|
| $\text{K}^+$       | 4000                  | KCl                                       | 95.36        |
| $\text{Ca}^{2+}$   | 4000                  | $\text{CaCl}_2$                           | 102.73       |
| $\text{Mg}^{2+}$   | 2000                  | $\text{MgCl}_2$                           | 97.35        |
| $\text{Fe}^{3+}$   | 800                   | $\text{FeCl}_3 \cdot 6\text{H}_2\text{O}$ | 97.16        |
| $\text{Zn}^{2+}$   | 240                   | $\text{ZnSO}_4$                           | 101.06       |
| $\text{Cu}^{2+}$   | 100                   | $\text{CuCl}_2$                           | 96.97        |
| $\text{NO}_3^-$    | 3800                  | $\text{NaNO}_3$                           | 104.24       |
| $\text{SO}_4^{2-}$ | 1000                  | $\text{Na}_2\text{SO}_4$                  | 101.00       |
| $\text{CO}_3^{2-}$ | 1000                  | $\text{Na}_2\text{CO}_3$                  | 103.16       |
| Glucose            | 500                   | Glucose                                   | 95.94        |
| Citrate            | 500                   | Sodium citrate                            | 100.87       |
